# Supplementary material for: Vernalization Procedure of Tuberous Roots Affects Growth, Photosynthesis and Metabolic Profile of Ranunculus asiaticus L
Source: MDPI journal article supplement (doi:10.3390/plants12030425), 2023-01-17
Supplement: s1 [file s1]

**Supplementary Table (S1)** Minor amino acids (in  $\mu\text{mol g}^{-1}$  DW) in plants of *Ranunculus asiaticus* L. hybrids MDR and MBO, obtained by three vernalization procedures of tuberous roots, only rehydration (Control, C), rehydration plus vernalization for 2 weeks (V2), rehydration plus vernalization for 4 weeks (V4). Week 8 from planting (vegetative phase). ns, \*, \*\* and \*\*\*; indicate non-significant or significant difference at  $p \leq 0.05$ ,  $p \leq 0.01$ ,  $p \leq 0.001$ , respectively. Different lowercase or capital letters within each row, for specific vernalization procedure, indicate significant differences ( $p \leq 0.05$ ).

| <i>Vegetative phase</i> | MDR     |          |          |        | MBO      |         |          |        | H   | V  | H x V |
|-------------------------|---------|----------|----------|--------|----------|---------|----------|--------|-----|----|-------|
|                         | C       | V2       | V4       | Mean   | C        | V2      | V4       | Mean   |     |    |       |
| Arg                     | 0.56 a  | 0.94 b   | 1.01 b   | 0.84   | 0.69 a   | 1.13 b  | 0.63 a   | 0.81   | ns  | ** | ***   |
| Hys                     | 3.33    | 4.46     | 5.28     | 4.36   | 4.46     | 5.26    | 3.53     | 4.42   | ns  | ns | ns    |
| Ile                     | 0.98 a  | 0.78 ac  | 0.76 bc  | 0.84   | 0.95 a   | 0.90 ab | 0.68 bc  | 0.84   | ns  | ** | *     |
| Leu                     | 0.76 a  | 0.84 a   | 0.80 a   | 0.80   | 0.93 a   | 1.69 c  | 0.40 d   | 1.01   | ns  | ns | ***   |
| Lys                     | 0.53 a  | 0.47 a   | 0.40 ac  | 0.47   | 0.37 ac  | 1.16 b  | 0.24 c   | 0.59   | ns  | *  | ***   |
| Met                     | 0.24 a  | 0.26 a   | 0.46 b   | 0.32   | 0.26 a   | 0.71 c  | 0.05 d   | 0.34   | ns  | ns | ***   |
| Phe                     | 0.60 a  | 0.45 b   | 0.38 b   | 0.48   | 0.68 a   | 1.17 c  | 0.28 d   | 0.71   | ns  | ** | ***   |
| Tyr                     | 1.10 ab | 0.96 bcd | 1.35 a   | 1.14 A | 0.62 c   | 0.70 dc | 1.04 abd | 0.79 B | **  | ns | **    |
| Trp                     | 0.26 a  | 0.23 a   | 0.58 b   | 0.36   | 0.30 a   | 0.38 a  | 0.24 a   | 0.31   | ns  | ns | **    |
| Val                     | 1.39    | 1.40     | 1.58     | 1.46   | 1.32     | 1.61    | 1.21     | 1.38   | ns  | ns | ns    |
| Minor AA                | 9.76 a  | 10.80 ac | 12.60 ab | 11.05  | 10.57 ac | 14.71 c | 8.30 c   | 11.19  | ns  | ns | **    |
| <i>Flowering phase</i>  | MDR     |          |          |        | MBO      |         |          |        | H   | V  | H x V |
|                         | C       | V2       | V4       | Mean   | C        | V2      | V4       | Mean   |     |    |       |
| Arg                     | 0.55 a  | 0.54 a   | 0.34 b   | 0.48   | 0.29 c   | 0.41 a  | 0.65 a   | 0.45   | ns  | ns | *     |
| Hys                     | 4.85 a  | 2.89 b   | 3.52 bc  | 3.75   | 3.12 b   | 3.02 b  | 4.07 c   | 3.40   | ns  | ns | ***   |
| Ile                     | 0.46 a  | 0.53 a   | 0.29 b   | 0.43   | 0.24 c   | 0.37 a  | 1.31 d   | 0.64   | ns  | ns | **    |
| Leu                     | 0.27 a  | 0.32 a   | 0.17 b   | 0.25 A | 0.40 c   | 0.51 d  | 1.17 e   | 0.69 B | *** | ns | **    |
| Lys                     | 0.42 ac | 0.27 bd  | 0.17 bd  | 0.29   | 0.21 d   | 0.36 ab | 0.53 c   | 0.37   | ns  | ns | ***   |
| Met                     | 0.05 a  | 0.07 ab  | 0.04 a   | 0.05 A | 0.09 bc  | 0.14 d  | 0.11 cd  | 0.11 B | *** | ns | ***   |
| Phe                     | 0.49 a  | 0.24 a   | 0.14 b   | 0.29   | 0.23 a   | 0.27 a  | 1.19 c   | 0.56   | ns  | ns | *     |
| Tyr                     | 0.57 ab | 0.67 ab  | 0.25 b   | 0.50   | 0.42 ab  | 0.45 ab | 1.47 c   | 0.78   | ns  | ns | ***   |
| Trp                     | 0.35 a  | 0.38 a   | 0.09 b   | 0.27   | 0.54 a   | 0.17 c  | 0.31 a   | 0.34   | ns  | *  | *     |
| Val                     | 0.92 a  | 0.79 ac  | 0.38 b   | 0.70   | 0.43 b   | 0.66 c  | 1.84 d   | 0.98   | ns  | ns | ***   |
| Minor AA                | 8.94 a  | 6.69 b   | 5.40 b   | 7.01   | 5.97 b   | 6.36 b  | 12.64 c  | 8.32   | ns  | ns | ***   |
